# Supplementary material for: Health risks to children from exposure to fecally-contaminated recreational water
Source: PubMed Central journal article supplement (PMC9004770; doi:10.1371/journal.pone.0266749), 2022-04-12

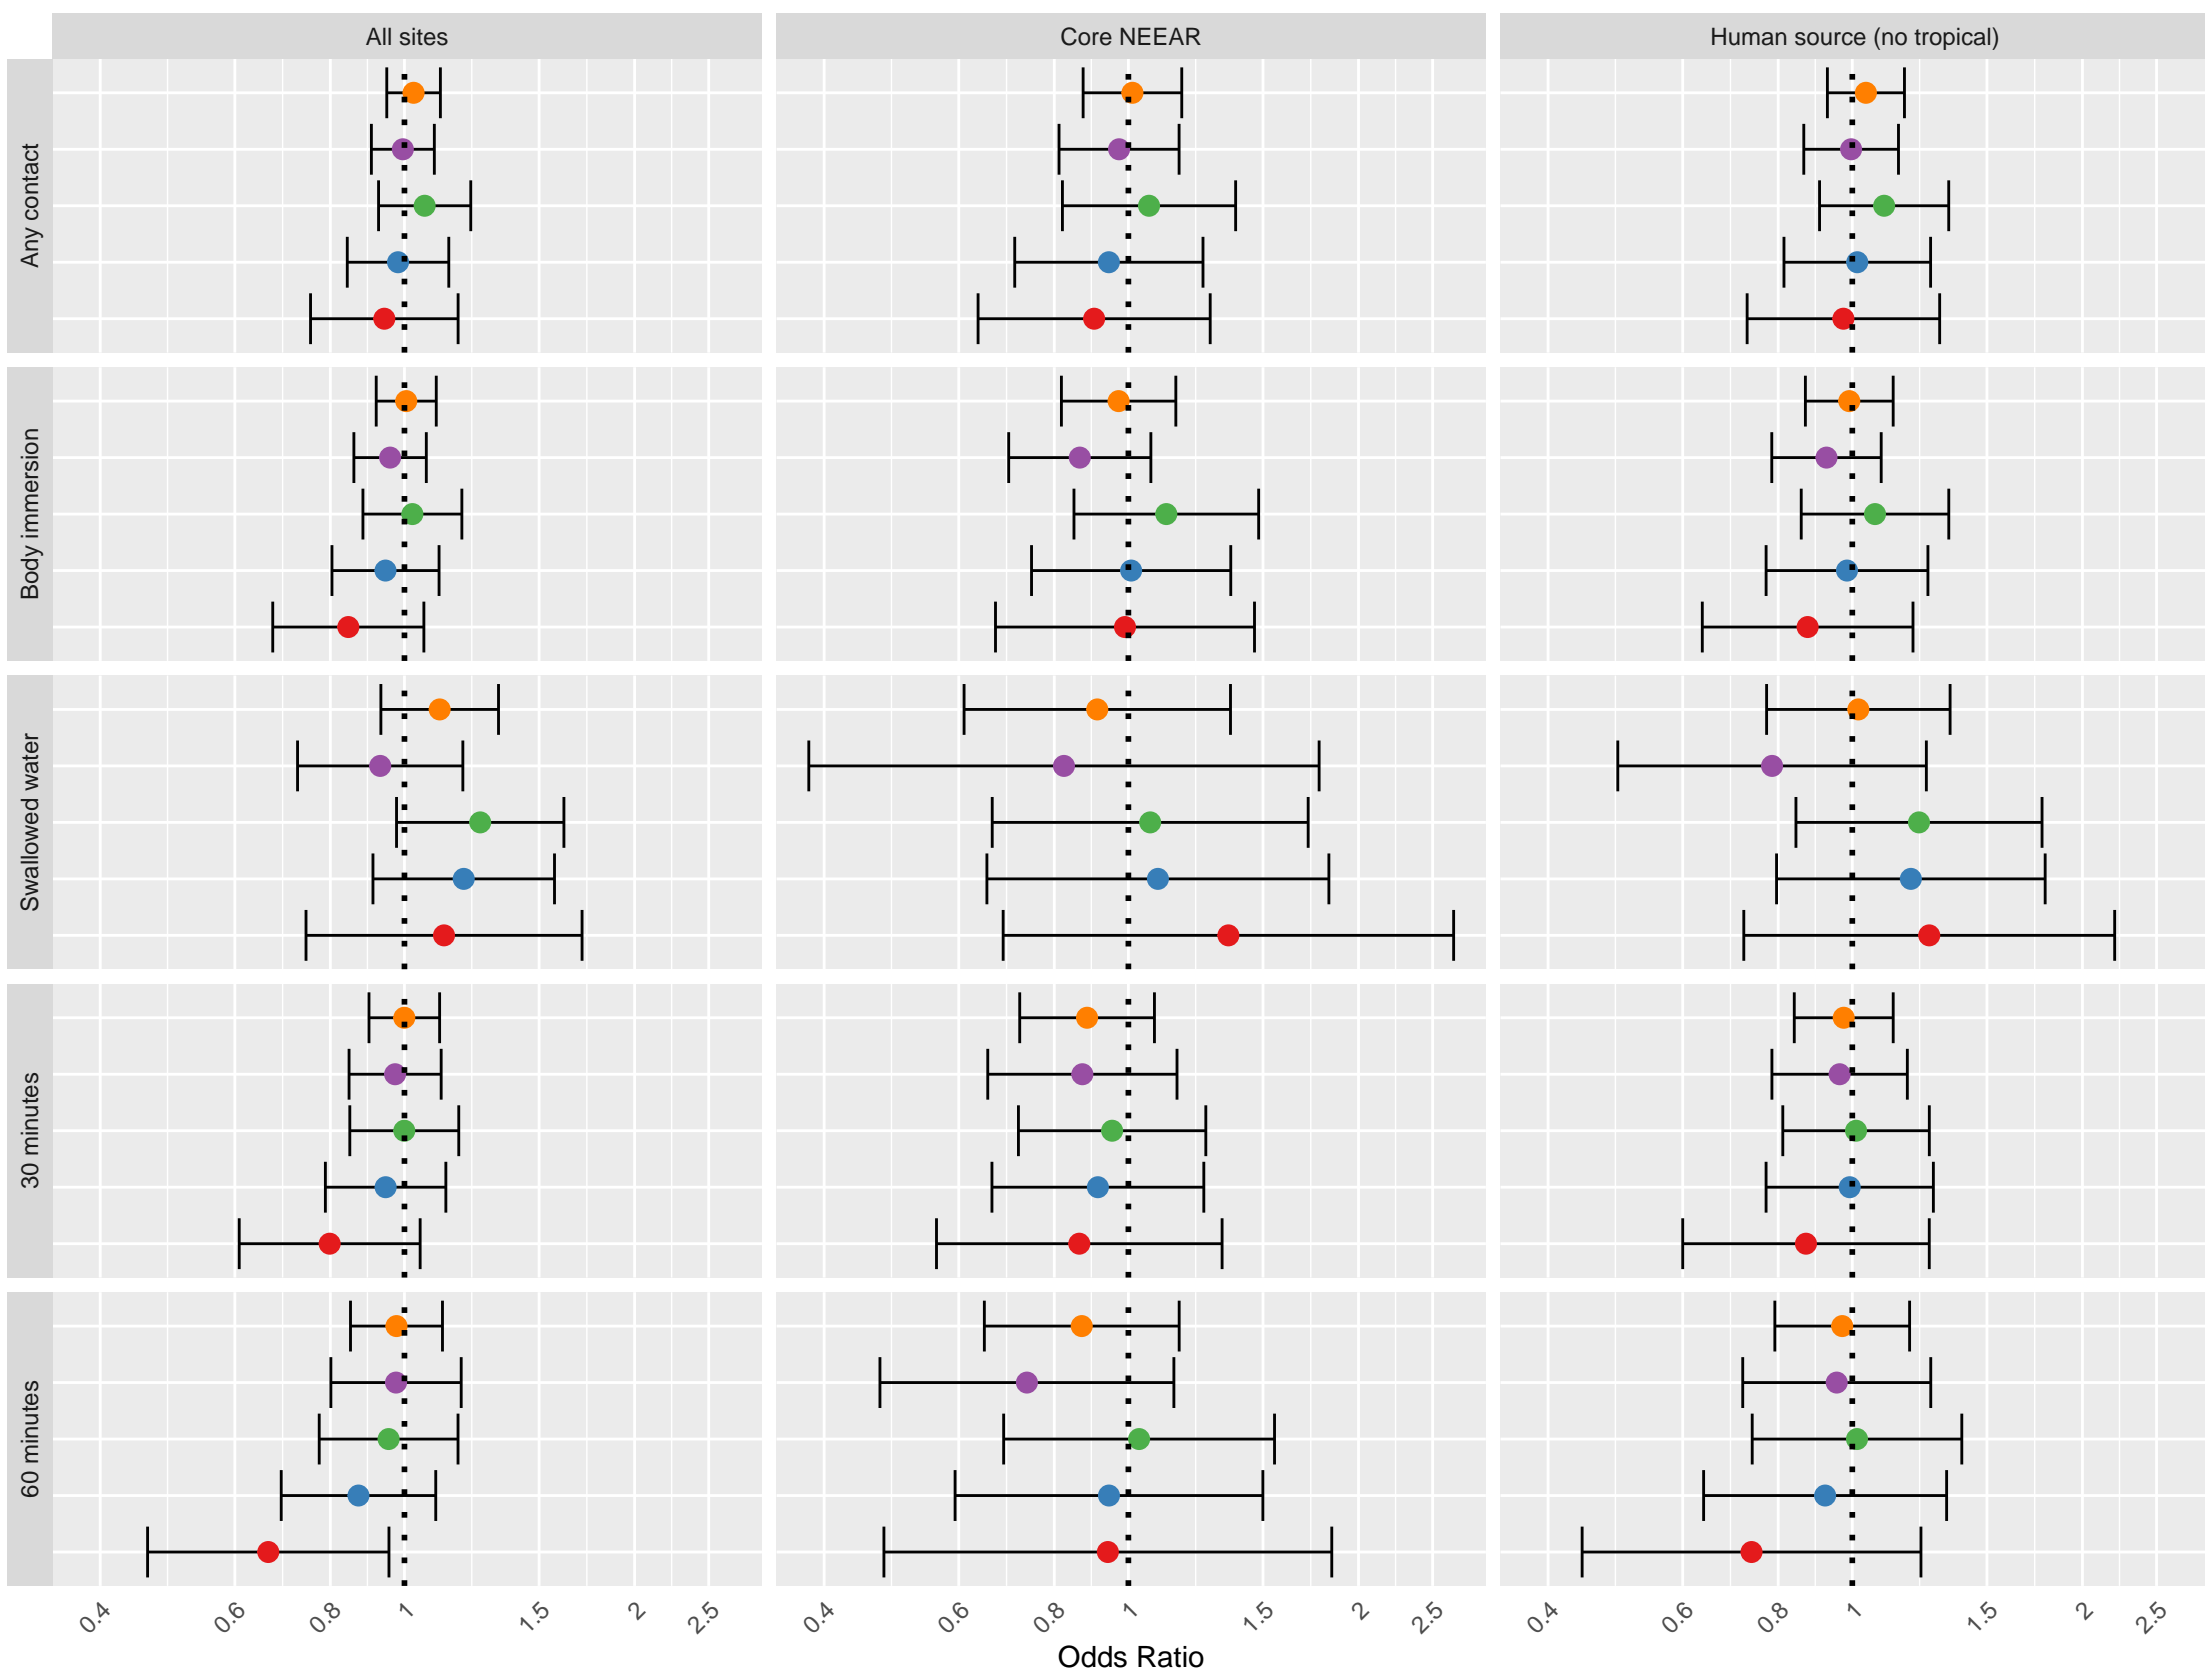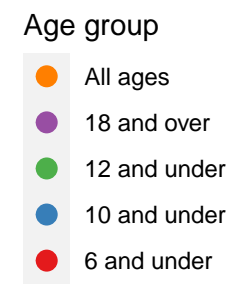

Supplement: pone.0266749.s014.pdf [file pone.0266749.s014.pdf]
